# Supplementary material
Source: PubMed Central journal article supplement (PMC3501035)
Supplement: supp_M112.384057_jbc.M112.384057-1.pdf [file supp_M112.384057_jbc.M112.384057-1.pdf]

**Supplementary data for:**

**Human histone H3K79 methyltransferase DOT1L binds actively transcribing RNA polymerase II to regulate gene expression**

Seung-Kyoon Kim<sup>‡,1</sup>, Inkyung Jung<sup>§,1</sup>, Hosuk Lee<sup>‡</sup>, Keunsoo Kang<sup>‡</sup>, Mirang Kim<sup>¶</sup>, Kwiwan Jeong<sup>1</sup>,  
Chang Seob Kwon<sup>†</sup>, Yong-Mahn Han<sup>‡</sup>, Yong Sung Kim<sup>¶</sup>, Dongsup Kim<sup>§</sup>, and Daeyoup Lee<sup>‡,2</sup>

From the <sup>‡</sup>Department of Biological Sciences and the <sup>§</sup>Department of Bio and Brain Engineering, Korea Advanced Institute of Science and Technology, Daejeon 305-701, Korea, <sup>†</sup>Department of Chemistry and Biology, Korea Science Academy of KAIST, Busan 614-822, Korea, and the <sup>¶</sup>Medical Genomics Research Center, Korea Research Institute of Bioscience and Biotechnology, Daejeon 305-806, Korea

\*Running title: *Interaction of hDOT1L with actively transcribing RNAPII*

To whom correspondence should be addressed: Department of Biological Sciences, Korea Advanced Institute of Science and Technology, 291 Daehak-ro, Yuseong-gu, Daejeon 305-701, Korea. Tel: +82-42-350-2623; Fax: +82-42-350-2610; E-mail: daeyoup@kaist.ac.kr

**Keywords:** Transcription; hDOT1L; RNA polymerase II; H2B monoubiquitylation; H3K79 methylation.

## SUPPLEMENTARY PROCEDURES

*Cell lines and construction of expression vectors*—NCCIT and HEK293T cells were cultured in RPMI 1640 (Gibco) and DMEM (Hyclone), respectively, supplemented with 10% fetal bovine serum (FBS, Hyclone) and 1% antibiotic-antimycotic solution (Hyclone) at 37°C in a humidified atmosphere containing 5% CO<sub>2</sub>.

The cDNA for *hDot11* was PCR amplified from the MegaMan library (Stratagene, La Jolla, CA, USA) and inserted into the mammalian expression vector, pME18SZ-FLAG. All sequences were verified by DNA sequencing. The primers for *hDot11* were as follows:

*hDot11* \_F-EcoRI: 5'-GGGGAATTCATGGGGGAGAAGCTGGAG

*hDot11* \_R-XhoI: 5'-GGGCTCGAGCTAGTTACCTCCAACGT

*Illumina library construction and sequencing*—The purified CHIP DNA fragments were ligated to paired adaptors designed for sequencing on the Illumina Genome Analyzer. The ligation products were size-fractionated on an agarose gel to obtain 200- to 300-bp fragments, and these fragments were subjected to 18 cycles of PCR amplification. Cluster generation and 72 cycles of single-read sequencing were performed.

*Modification peak detection*—Modification peaks were determined using MACS-1.3.7.1 (59) with default parameters, except that we changed the -mfold option to 5 and the -pvalue option to 1E-4. For the control, the un-treated input sequencing result (IgG) was used. The number of overlapping peaks between hDOT1L and RNAPII was calculated by counting the number of hDOT1L peaks located within 2 kb upstream and downstream of RNAPII peaks.

*High-quality hDOT1L binding sites*—To get a more stringent set of hDOT1L binding sites, we used the following thresholds: -mfold 5,25 and -pvalue 1E-5. A total of 8,953 hDOT1L binding sites were re-obtained and sorted by 'FDR' and 'enrichment folds' categories, which are attributes of each binding site. High-quality binding sites (the top 500) were defined as the regions containing lower FDRs and higher enrichment folds. To draw the average tag density graphs of hDOT1L, the RNAPII, as well as IgG (supplementary Fig. S2), flanking regions (+/- 10,000 bp) of each high-quality hDOT1L binding site were divided into 100-bp bins, and tags in each bin were summed. The average number of tags in each bin position around the high-quality hDOT1L binding sites was calculated and plotted. In case of the fold-enrichment graph (Fig. 6), the flanking regions (+/- 10,000 bp) of 223 high-quality hDOT1L binding sites containing the predicted hDOT1L motif were examined.

*Ontology analysis using GREAT (version 1.5.1)*—Ontology analysis was performed by GREAT with the following settings: Top Rows/Table, 40; Statistical Significance, *Raw P-value*; and View, *Significant By Region-based Binomial* (<http://great.stanford.edu>) (60). For input genomic sites, we used the defined

high-quality hDOT1L binding sites. Pathway commons category contains numerous pathways, including biochemical reactions, complex assembly, transport, and catalysis events, as well as physical interactions. The result describes significantly-associated pathways based on attributes of the gene products around binding sites. The test set of 500 hDOT1L binding sites picked 722 genes (4%) out of 17,506 tested genes. The pathway commons category contained 1,400 terms covering 4,665 (27%) of the 17,506 total genes.

*Generation of hDOT1L expression constructs*—Full-length hDOT1L cDNA was amplified by PCR from the MegaMan Human Transcriptome Libraries (Stratagene) and cloned into the pGEM-T Easy vector (Promega). The resulting hDOT1L cDNA clone was confirmed by sequence analysis and then subcloned into the pME18S-FLAG vector (addgene). The expression of FLAG-hDOT1L from the resulting pME18S-FLAG-hDOT1L plasmid was confirmed by western blotting using an anti-FLAG antibody (Sigma F1804). Next, we generated hDOT1L (WT), hDOT1L-si<sup>R</sup> (si<sup>R</sup>), hDOT1L-4K/618-627/4A (4K/4A), hDOT1L-N241A-si<sup>R</sup> (N241A-si<sup>R</sup>) in both pME18S-FLAG and pFastBac-FLAG vector (Invitrogen) for co-immunoprecipitation analyses and *in vitro* assay, respectively. Also, we generated hDOT1L deletion constructs; hDOT1L (1-467), (468-1002), and (1003-1537) in pFastBac-FLAG vector and overlapping truncations; hDOT1L (468-665), (666-820), (821-1002), (555-820), (555-820)-4K/618-627/4A, and (555-820)-Δ4K/618-627 in pET28a vector (Novagen) for peptide pull down assay.

*Antibodies*—The utilized antibodies recognizing hSNF5/INI1, yDot1, H3, NANOG, OCT4, and SOX2 were polyclonal rabbit antibodies produced in-house as previously described (31,61). The utilized commercial antibodies included those against H3K79me1 (abcam, ab2886), H3K79me2 (abcam, ab3594), H3K79me3 (abcam, ab2621),  $\alpha$ -Rpb1 (Millipore, ABE30),  $\alpha$ -RNAPII (abcam, ab817),  $\alpha$ -RNAPII Ser5/2-P (Cell Signaling, 4735),  $\alpha$ -RNAPII Ser5-P (abcam, ab5131),  $\alpha$ -RNAPII Ser2-P (abcam, ab5095), H2Bmono-ub (Millipore, 17-650), hDOT1L (abcam, ab64077), ENL (abcam, 49052), FLAG (Sigma, F1804), HIS (Santa Cruz Biotechnology, sc-8036), and  $\beta$ -actin (Santa Cruz Biotechnology, sc-47778).

*RNA isolation and reverse transcription (RT)*—Total RNA was isolated from triplicate cultures of NCCIT cells using the TRIZOL<sup>®</sup> Reagent (Invitrogen) according to the manufacturer's protocols. Briefly, NCCIT cells grown in 100-mm diameter dishes were harvested. One ml of TRIZOL was added, and the cell lysate was passed through a pipette several times. The homogenized samples were incubated for 5 min at 25°C to permit the complete dissociation of nucleoprotein complexes, and 200  $\mu$ l of chloroform was added. The sample tubes were shaken vigorously by hand for 15 sec and incubated at 25°C for 2 ~ 3 min. The samples were cleared by centrifugation at 12,000  $\times$  g for 15 min at 4°C, and the aqueous phase was transferred to a fresh tube. To precipitate the RNA from the aqueous phase, the

sample was mixed with 500  $\mu$ l isopropyl alcohol and incubated at 25°C for 10 min. The RNA samples were cleared by centrifugation at  $12,000 \times g$  for 15 min at 4°C and washed once with 75% ethanol, and the RNA pellet was briefly dried and dissolved in RNase-free water. Finally, cDNA was synthesized from 1  $\mu$ g of DNase-treated total RNA, using the Improme Kit (Promega) according to the manufacturer's guidelines.

*Real-time PCR*–qPCR analysis was performed with CFX96 (Bio-Rad). The DNA was amplified in a 20- $\mu$ l reaction with 2X h-Taq real time mix (Solgent), 20X Evagreen (Biotium), 20X tetraethylammonium chloride, 10 pmol of each primer, and the template DNA. PCR reactions were carried out using the following conditions: an initial melting step of 95°C for 12 min, followed by 40 cycles of 95°C for 20 sec (denaturation), 57°C for 30 sec (annealing), and 72°C for 30 sec (extension), and then a final extension at 72°C for 5 min. The primer specificity for PCR amplification was tested by agarose gel electrophoresis. After PCR amplification, melting curve analysis was used to verify the amplification of a single PCR product. The threshold cycle (Ct) was determined for each reaction. For calculation purposes, the average Ct values of two copies of the IP DNA and input DNA from three independent reactions were termed A and B, respectively. The following formula was used to calculate fold enrichment (F) for each IP sample:  $F = 1/2^{(A-B)}$ . The relative mRNA levels were quantified with respect to that of  $\beta$ -actin.

*Histone methyltransferase (HMT) assay*–*In vitro* histone methyltransferase assays were performed as previously described (62). Briefly, recombinant hDOT1L proteins were generated using a baculovirus expression system, and 500 ng purified recombinant protein was incubated at 30°C for 6 h in 20  $\mu$ l containing 50 mM Tris-HCl (pH 8.0), 5% glycerol, 20 mM KCl, 5 mM MgCl<sub>2</sub>, 1 mM dithiothreitol, 1 mM PMSF, 1  $\mu$ l of [<sup>3</sup>H] methyl S-adenosyl-methionine (1 $\mu$ Ci, Amersham Biosciences), and 500 ng of HeLa long oligonucleosomes (LON) as a substrate. The reaction was stopped by the addition of SDS sample buffer, the samples were separated by 14% SDS-PAGE, and the results were visualized by radiography.

*Alkaline phosphatase assays*–Alkaline phosphatase activity was measured using an alkaline phosphatase detection kit (Millipore, SCR004) according to the manufacturer's guidelines, with minor modifications. Briefly, NCCIT cells were plated in 12-well plates, incubated overnight, and transfected with 60 nM *Egfp*- and 100 nM *hDot11*-siRNA. For rescue approaches, si<sup>R</sup>, 4K/4A, and N241A-si<sup>R</sup> were transfected into NCCIT cells that had been depleted of endogenous hDOT1L. After three days of siRNA transfection, the cells were fixed, stained, and washed. Images were obtained under a microscope.

## SUPPLEMENTARY REFERENCES

60. McLean, C. Y., Bristor, D., Hiller, M., Clarke, S. L., Schaar, B. T., Lowe, C. B., Wenger, A. M., and Bejerano, G. (2010) GREAT improves functional interpretation of cis-regulatory regions. *Nat Biotechnol* **28**, 495-501
61. Hwang, S., Lee, D., Gwack, Y., Min, H., and Choe, J. (2003) Kaposi's sarcoma-associated herpesvirus K8 protein interacts with hSNF5. *J Gen Virol* **84**, 665
62. Shi, X., Hong, T., Walter, K. L., Ewalt, M., Michishita, E., Hung, T., Carney, D., Lan, F., Kaadige, M. R., and Lacoste, N. (2006) ING2 PHD domain links histone H3 lysine 4 methylation to active gene repression. *Nature* **442**, 96-99

## SUPPLEMENTARY FIGURES AND TABLES

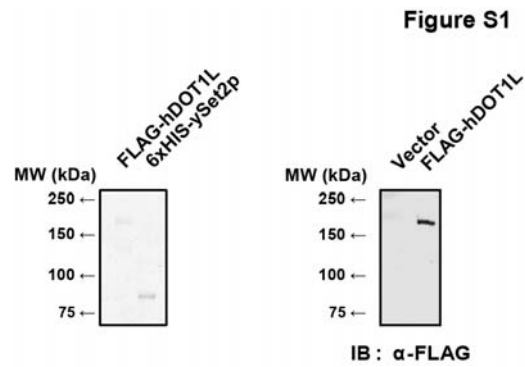

**Supplementary FIGURE 1. The purified recombinant proteins used in this study.** Left panel, Full-length FLAG-hDOT1L was purified from a Sf-21 insect cell-based baculovirus system, and 6xHIS-ySet2p was purified from a bacterial system. The two proteins were resolved by SDS-PAGE and stained with Coomassie blue. Right panel, The full-length FLAG-hDOT1L was resolved by SDS-PAGE and immunoblotted using the indicated antibody.

Figure S2

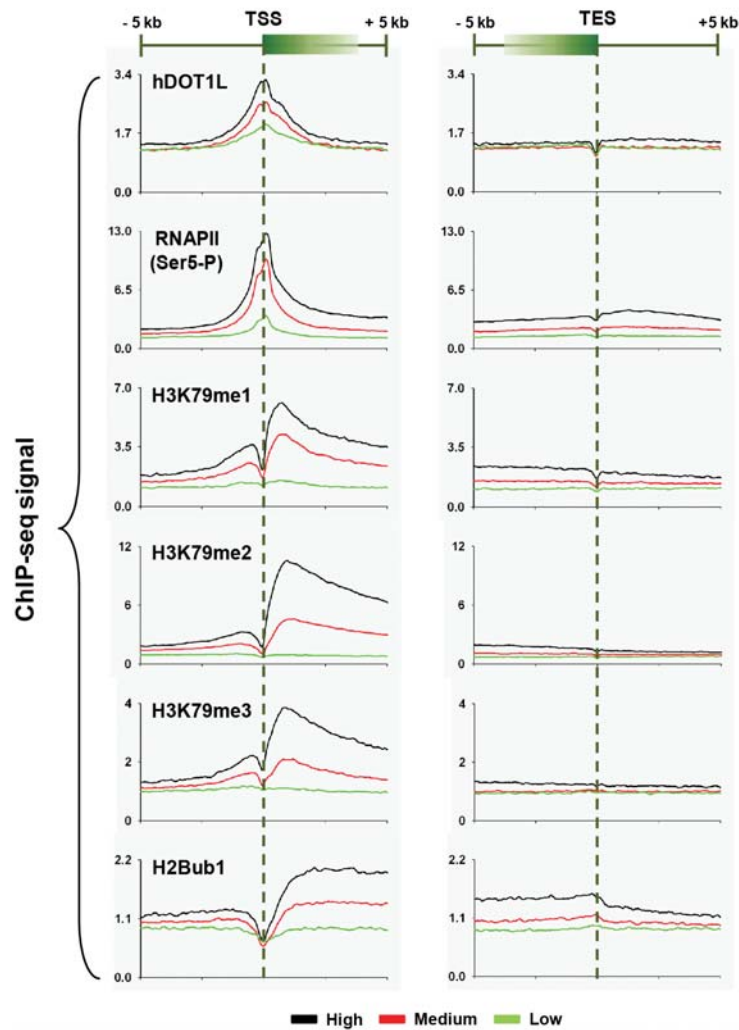

**Supplementary FIGURE 2. Complete data from the genome-wide analysis of hDOT1L, RNAPII, and histone modifications near the TSS and TES.** ChIP-seq results for hDOT1L, RNAPII, H3K79me1, H3K79me2, H3K79me3, and H2Bub1 are shown. The average intensity of the mapped sequence read counts is presented for the high (top 30%), middle, and low (bottom 30%) levels of gene expression. The profiles show 5 kb upstream and downstream of the TSS and TES.

**Figure S3**

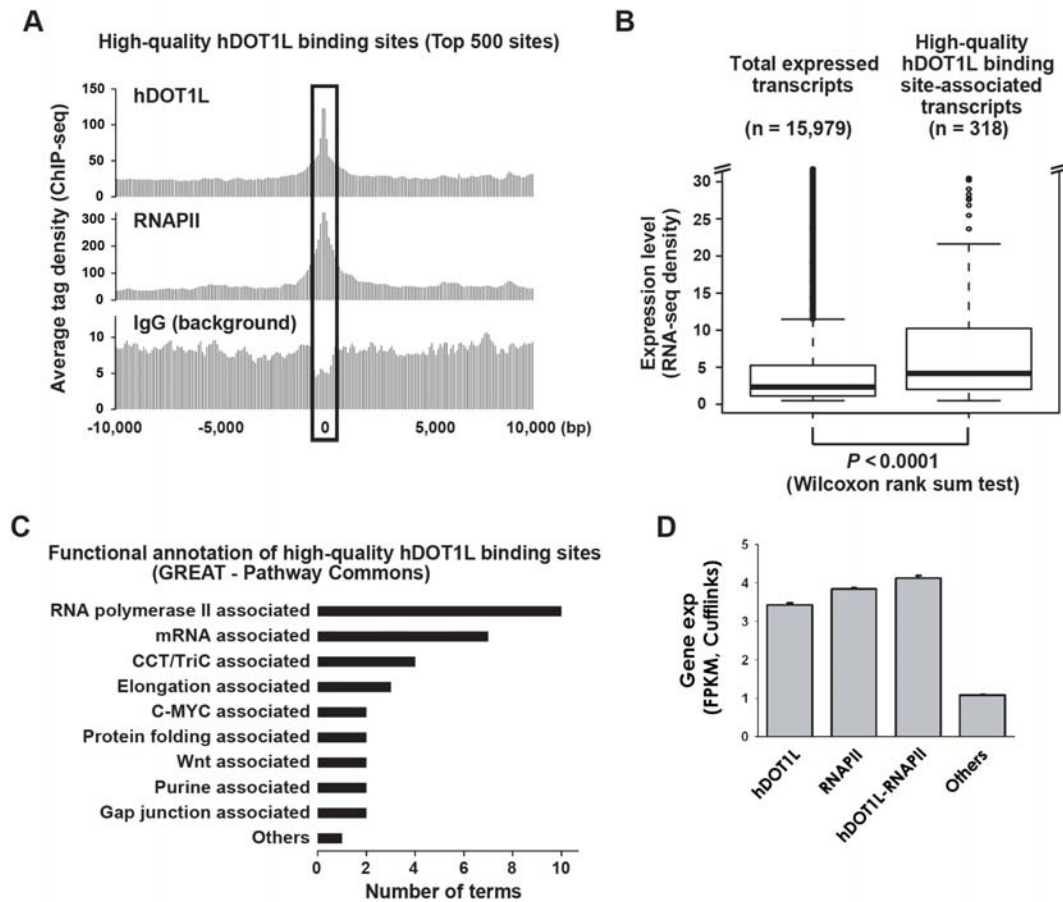

**Supplementary FIGURE 3. Comprehensive analysis of high-quality hDOT1L binding sites.** A-C, A total of 8,953 hDOT1L-enriched regions were obtained from a re-analysis of our ChIP-seq results using MACS (see Methods) (59). Among the 8,953 hDOT1L-enriched regions, the top 500 sites that showed low FDRs (false discovery rates) and high-fold enrichment were regarded as high-quality hDOT1L binding sites. A, The high-quality hDOT1L binding sites are highly occupied by actively transcribing RNAPII (ChIP using anti-RNAPII phospho CTD Ser-5). B, The expression level of whole transcripts (n = 15,979) in the NCCIT cell line were measured using RNA-seq, and compared with the high-quality hDOT1L binding site-associated transcripts (n = 318) (see Methods) (60). C, Functional annotation analysis of high-quality hDOT1L binding sites in the promoter regions was performed with GREAT (see Supplementary Methods), which infers the functions of binding sites by exploiting available gene annotation databases. The top 40 terms in the ‘Pathway Commons’ category, which were significantly associated with the binding sites (binomial P-value <  $4.3 \times 10^{-3}$ ), were clustered by keywords, and the number of terms in each cluster was counted. D, Genes targeted by both hDOT1L and RNAPII tend to be highly expressed. The median gene expression levels and standard deviations of hDOT1L-targeted genes, RNAPII-targeted genes, and genes targeted by both hDOT1L and RNAPII



were plotted using 100 iterations randomly selecting 90% of the genes in each group (y-axis). The P-values between the co-occupied gene set and hDOT1L or RNAPII occupied genes were 0.0015 and 0.001, respectively (KS-test). 'Others' indicates genes that were targeted by neither hDOT1L nor RNAPII (n = 12,010).

Figure S4

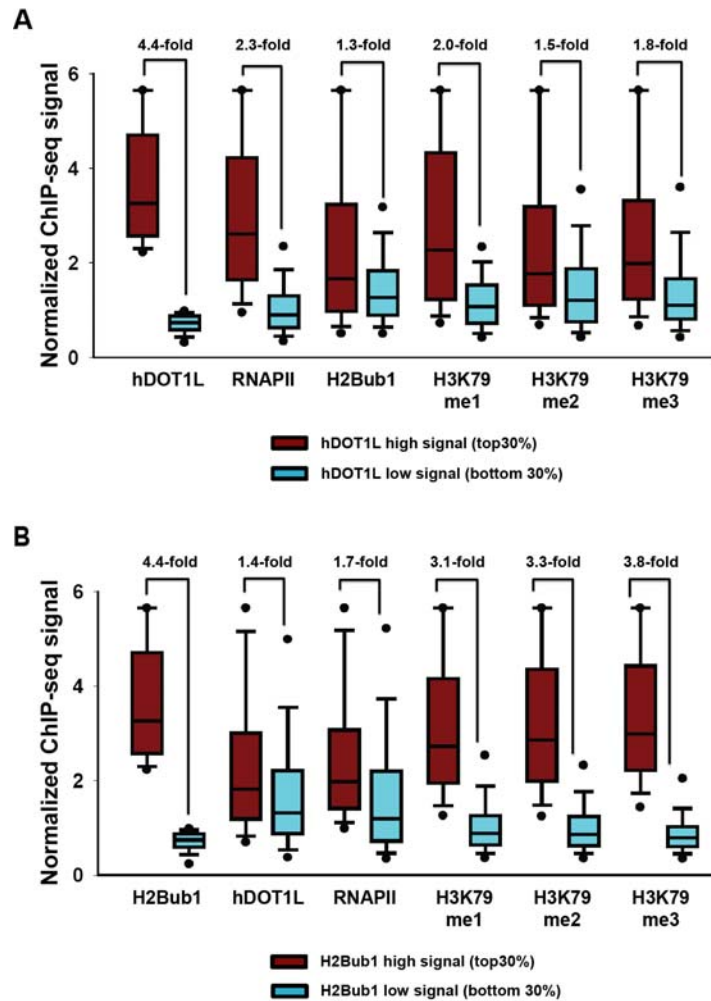

**Supplementary FIGURE 4. Patterns of genome-wide co-occurrence between hDOT1L and other modification patterns in gene body regions.** *A*, Box plots illustrate modification signals in hDOT1L-enriched (red, top 30%) and -depleted genes (cyan, bottom 30%), with the fold enrichment between gene groups shown. Due to scale differences between the modifications, the ChIP-seq signals were quintile-normalized. *B*, Boxplots of modification signals in H2BUB1-enriched (red, top 30%) and -depleted genes (cyan, bottom 30%) with the fold enrichment between gene groups.

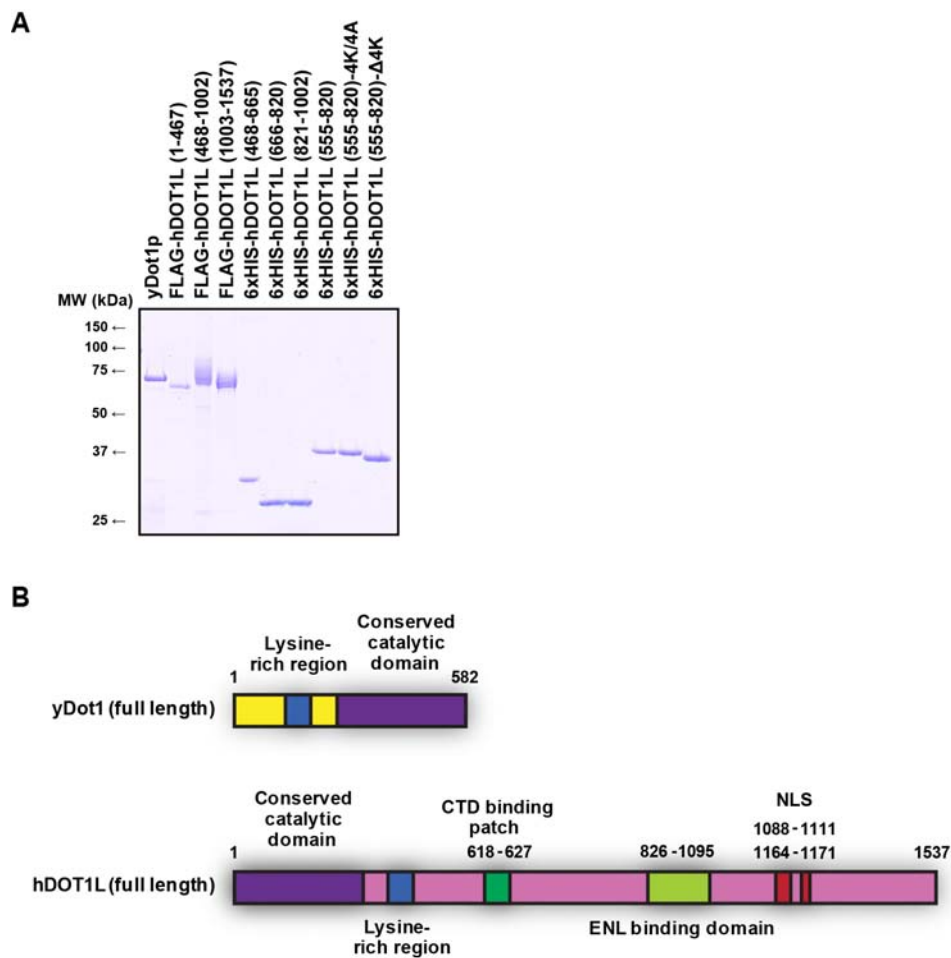

**Supplementary FIGURE 5. Schematic representation of the full-length yDot1 and human hDOT1L constructs used in the experiment.** *A*, Several purified recombinant proteins were used in this study. FLAG-hDOT1L (1-467), (468-1002) and (1003-1537) were purified from an Sf-21 insect cell-based baculovirus expression system, while the others were purified from a bacterial system. All proteins were resolved by SDS-PAGE and stained with Coomassie blue. FLAG-hDOT1L (468-1002) and (1003-1537) take on multiple forms, possibly due to a post-translational modification such as glycosylation. *B*, Full-length yDot1p and hDOT1L are compared. The CTD binding patch of hDOT1L identified in this study is shown within the long undefined middle and C-terminal regions of hDOT1L.

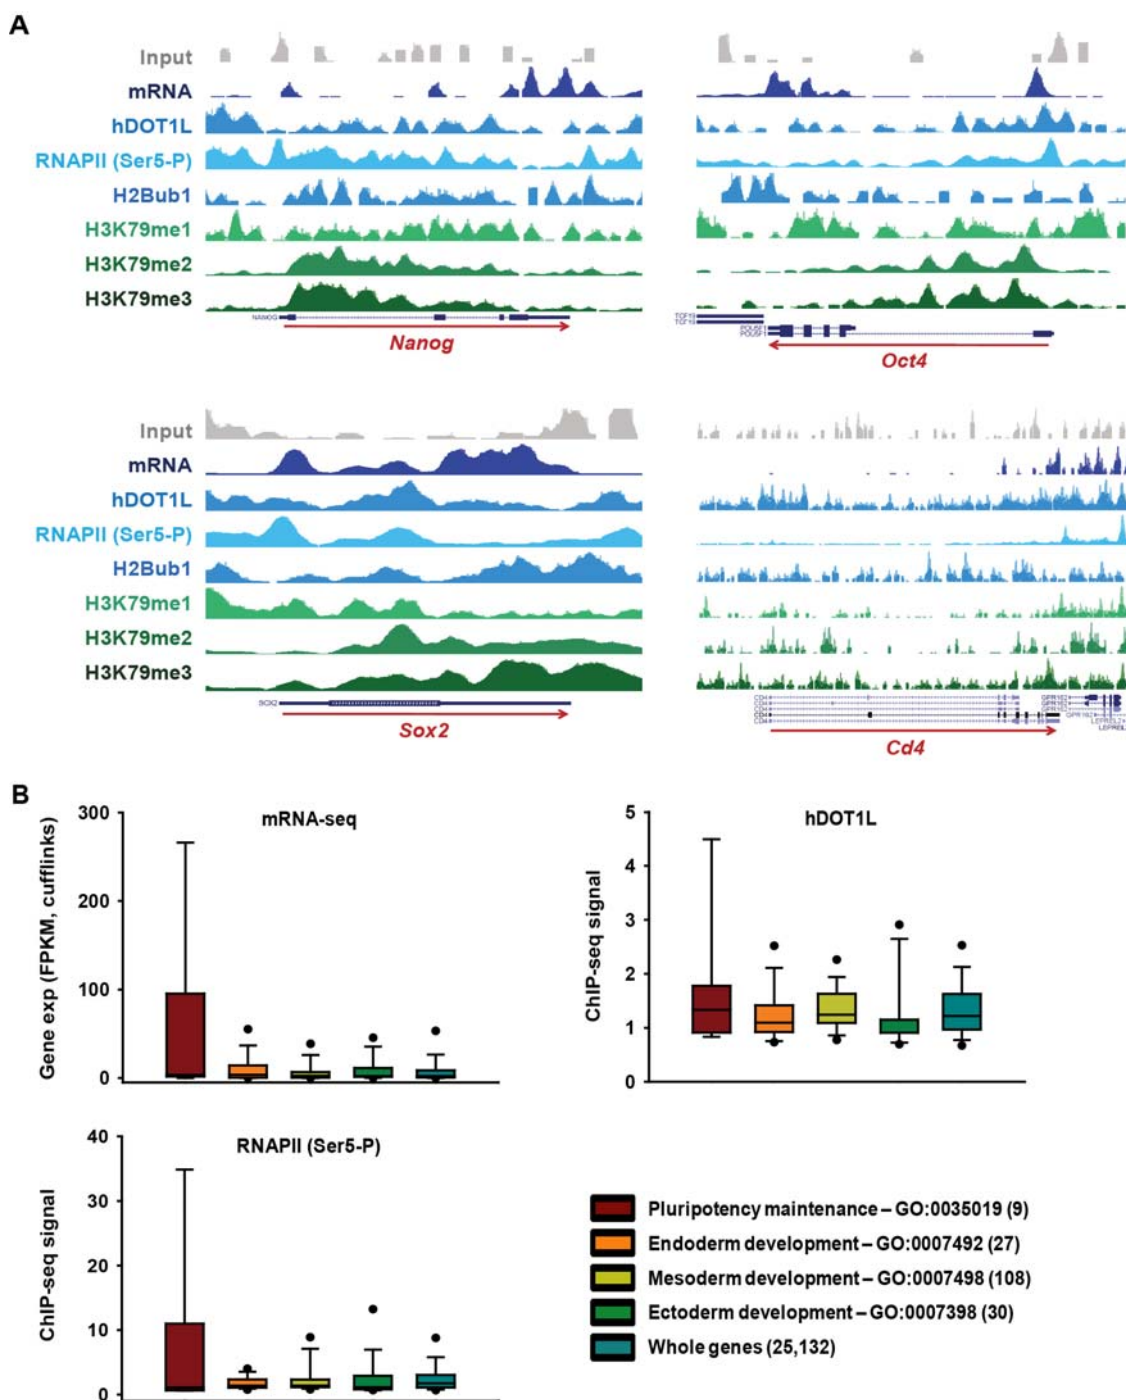

**Supplementary FIGURE 6. Actively-transcribed pluripotency maintenance-related genes are co-occupied by both hDOT1L and RNAPII.** A, All ChIP-seq data were mapped to the human genome (UCSC hg18 assembly based on NCBI build 36.1). The y-axis indicates the read counts of sequence tags in 10-bp increments. The figure shows the results from the RNA-seq and six different ChIP-seq results for hDOT1L, RNAPII, H3K79me1, H3K79me2, H3K79me3, and H2BUB1. The random distribution of IgG along the genome and its strong enrichment in specific regions may reflect

sequencing bias and the normalization process. *B*, top left, Box plot of gene expression levels in pluripotency-related genes. The utilized genes were extracted from the Gene Ontology database. We focused on nine pluripotency maintenance-related genes along with 25,132 total genes and representative development-related genes (27 endoderm genes, 108 mesoderm genes, and 30 ectoderm genes). *B*, top right and bottom left, hDOT1L and RNAPII were enriched at pluripotency maintenance-related genes compared to development-related genes.

Figure S7

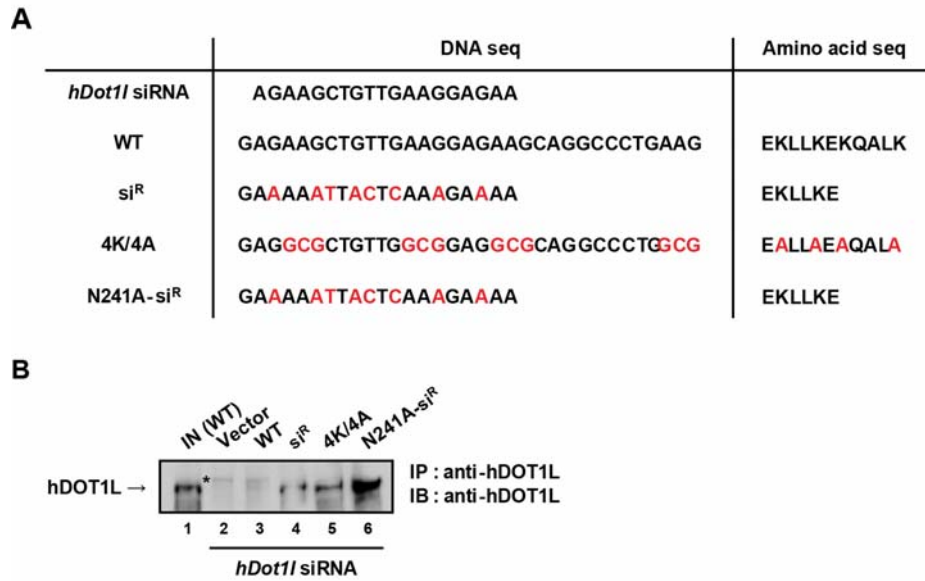

**Supplementary FIGURE 7. SiRNA-mediated knock-down of hDOT1L.** A, DNA sequence comparison of the *hDot1l* siRNA used in this study versus its target sequences in the WT, si<sup>R</sup>, 4K/4A, and N241A-si<sup>R</sup> constructs. Amino acid sequences for the corresponding DNA sequences of the *hDot1l* constructs are also shown. B, The *hDot1l* siRNA was transiently transfected into NCCIT cells, followed by transfection with control vector, WT, si<sup>R</sup>, 4K/4A, and N241A-si<sup>R</sup>. Whole-cell extracts were immunoprecipitated overnight with anti-DOT1L at 4°C. IP samples were resolved by SDS-PAGE and immunoblotted with the indicated antibodies. A nonspecific band in the hDOT1L immunoblot is indicated by an asterisk.

Figure S8

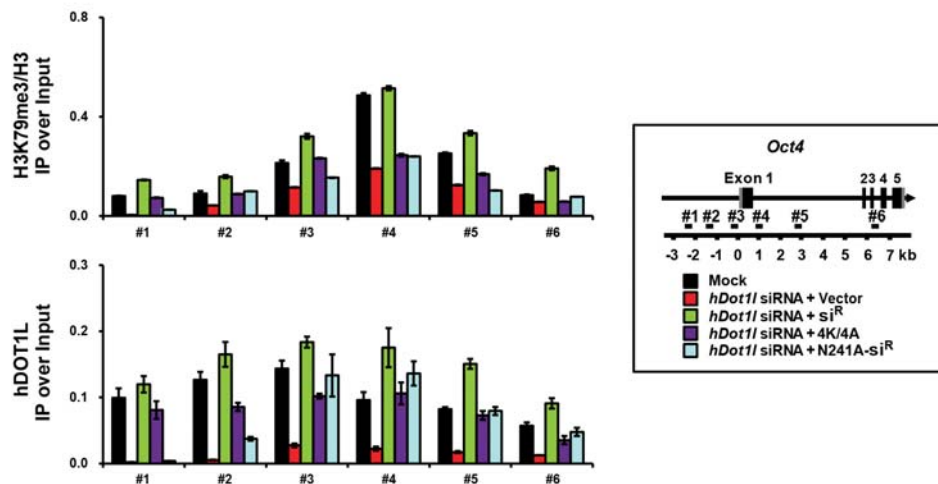

**Supplementary FIGURE 8. The decrease in H3K79me3 was rescued by exogenous hDOT1L but not by an enzymatic activity-defective mutant.** Schematic representation of the *Oct4* locus, along with the location of the primers and ChIP analyses. Control vector, si<sup>R</sup>, 4K/4A, and N241A-si<sup>R</sup> were transfected into hDOT1L-knockdown NCCIT cells, and ChIP analyses were carried out with indicated antibodies. All signals were normalized with respect to the input and total histone H3. Error bars denote standard deviations from three biological replicates, each consisting of three qPCR reactions.

**Supplementary Table 1.** Real-time qPCR primers

| Gene                | Seq (5' → 3')           | Product size |
|---------------------|-------------------------|--------------|
| <i>hDot11</i> -RT-F | CAGCTTCAGTGATGGTGCTTCT  | 132          |
| <i>hDot11</i> -RT-R | AGCTGCCTCTTGCTCAGGAAA   |              |
| <i>Nanog</i> -RT-F  | ACCTTCCAATGTGGAGCAACCA  | 184          |
| <i>Nanog</i> -RT-R  | TGCATGCAGGACTGCAGAGATT  |              |
| <i>Oct4</i> -RT-F   | AAACCCACACTGCAGCAGATCA  | 126          |
| <i>Oct4</i> -RT-R   | TCGTTGTGCATAGTCGCTGCTT  |              |
| <i>Sox2</i> -RT-F   | TGTGGTTACCTCTTCCTCCCACT | 138          |
| <i>Sox2</i> -RT-R   | TGGTAGTGCTGGGACATGTGAA  |              |

**Supplementary Table 1.** Primer sets used in real-time qPCR. Primer sets were designed using the online IDT program (<http://eu.idtdna.com/Scitools/Applications/Primerquest/>).



**Supplementary Table 2.** Conventional ChIP primers

| Gene                   | Seq (5' → 3')              | Product size |
|------------------------|----------------------------|--------------|
| <i>Nanog</i> _-2,698_F | TGGTCAGCTCCTTTACTGCAACCT   | 231          |
| <i>Nanog</i> _-2,698_R | TGGGAGAGAACACGGCAACTAA     |              |
| <i>Nanog</i> _-1,506_F | AAGAGAGACAGGAGGGGCAAGTT    | 254          |
| <i>Nanog</i> _-1,506_R | TGCTCCCACACAAGCTGACTTT     |              |
| <i>Nanog</i> _-576_F   | TTTGAGACGTAGTCCCGCTCTGTT   | 211          |
| <i>Nanog</i> _-576_R   | GAGTTTGAAACCAGCCTGGCCAACAT |              |
| <i>Nanog</i> _+636_F   | ATGGGCTTAGGCATGGTGGAAA     | 287          |
| <i>Nanog</i> _+636_R   | AGCTGCCCAGTAACATCCACAA     |              |
| <i>Nanog</i> _+2,931_F | TAACACCCAGTGTGGGAGCTTT     | 268          |
| <i>Nanog</i> _+2,931_R | ATCTCCTGGGTTCAAGCGATTCTCCT |              |
| <i>Nanog</i> _+6,184_F | AACAGCTGGGATTTACAGGCGT     | 205          |
| <i>Nanog</i> _+6,184_R | AGCCTCCCAATCCCAAACAATACG   |              |
| <i>Oct4</i> _-2,549_F  | GAGGATGGCAAGCTGAGAAA       | 148          |
| <i>Oct4</i> _-2,549_R  | CTCAATCCCCAGGACAGAAC       |              |
| <i>Oct4</i> _-1,672_F  | AGCCCCACTAAACAAAGCAC       | 162          |
| <i>Oct4</i> _-1,672_R  | GCAATCCCCTCAAAGACTGA       |              |
| <i>Oct4</i> _-264_F    | AGTCTGGGCAACAAAGTGAGA      | 169          |
| <i>Oct4</i> _-264_R    | AGAAACTGAGGCGAAGGATG       |              |
| <i>Oct4</i> _+990_F    | ATCTCCTGTTTGGGCTGTGTGT     | 250          |
| <i>Oct4</i> _+990_R    | TTCAATCCCGCAGCAGCTCTAT     |              |
| <i>Oct4</i> _+2,825_F  | ACTTCAGGGCCTTGCCACATTA     | 207          |
| <i>Oct4</i> _+2,825_R  | TTTGCAGTGAGCCAAGATCGCA     |              |
| <i>Oct4</i> _+6,131_F  | AACCTGGAGTTTGTGCCAGGGTTT   | 202          |
| <i>Oct4</i> _+6,131_R  | TGTCTATCTACTGTGTCCCAGGCT   |              |
| <i>Sox2</i> _-2,133_F  | TCTCCAGGTCCGTGTTTACCTT     | 192          |
| <i>Sox2</i> _-2,133_R  | TTTCCAATCAACCTTCTGCCC      |              |
| <i>Sox2</i> _-227_F    | AAAGGTTTCTCAGTGGCTGGCA     | 190          |
| <i>Sox2</i> _-227_R    | TGGGTTTCTAGCGACCAATCAG     |              |
| <i>Sox2</i> _+561_F    | TGAATGCCTTCATGGTGTGGTC     | 84           |
| <i>Sox2</i> _+561_R    | TGCTGATCTCCGAGTTGTGCAT     |              |
| <i>Sox2</i> _+1,581_F  | AAACCGCGATGCCGACAAGAAA     | 198          |

|                        |                         |     |
|------------------------|-------------------------|-----|
| <i>Sox2</i> _+1,581_R  | TGCAAACCTTCCTGCAAAGCTCC |     |
| <i>Cd4</i> _ -1,897_F  | AATACCTAGGCTTTCTCGGGCA  | 119 |
| <i>Cd4</i> _ -1,897_R  | AAGTTCTTGCAGGCAGTGTGCT  |     |
| <i>Cd4</i> _ -416_F    | TTGCAGTGGTGCAATCTTGGCT  | 163 |
| <i>Cd4</i> _ -416_R    | AGCCTGGCCAACATGGTGAAA   |     |
| <i>Cd4</i> _ +272_F    | TGATCTCGGCTCACTGCAATCT  | 152 |
| <i>Cd4</i> _ +272_R    | AGCCTGGCCAACATGGTGAAA   |     |
| <i>Cd4</i> _ +19,337_F | TCTTTGTTTCCTGCAGCCGGTTT | 176 |
| <i>Cd4</i> _ +19,337_R | TGGCAAATTGTAGAGGAGGCGA  |     |

**Supplementary Table 2.** Primer sets used in conventional ChIP. Primer sets were designed using the online IDT program (<http://eu.idtdna.com/Scitools/Applications/Primerquest/>).

**Supplementary Table 3.** Pluripotency maintenance-related genes

| <b>Accession number</b> | <b>Gene</b>   | <b>GO number</b> | <b>Function</b>                             |
|-------------------------|---------------|------------------|---------------------------------------------|
| NM_003106               | <i>SOX2</i>   | GO:0035019       | Transcription factor SOX-2                  |
| NM_000222               | <i>KIT</i>    | GO:0035019       | Mast/stem cell growth factor receptor       |
| NM_000038               | <i>APC</i>    | GO:0035019       | Adenomatous polyposis coli protein          |
| NM_002701               | <i>POU5F1</i> | GO:0035019       | POU domain, class 5, transcription factor 1 |
| NM_006766               | <i>MYST3</i>  | GO:0035019       | Histone acetyltransferase MYST3             |
| NM_005170               | <i>ASCL2</i>  | GO:0035019       | Achaete-scute homolog 2                     |
| NM_024865               | <i>NANOG</i>  | GO:0035019       | Homeobox protein NANOG                      |
| NM_001265               | <i>CDX2</i>   | GO:0035019       | Homeobox protein CDX-2                      |
| NM_206937               | <i>LIG4</i>   | GO:0035019       | DNA ligase 4                                |

**Supplementary Table 4.** Endoderm development-related genes

| Accession number | Gene           | GO number  | Function                                           |
|------------------|----------------|------------|----------------------------------------------------|
| NM_030761        | <i>WNT4</i>    | GO:0007492 | Protein Wnt-4                                      |
| NM_002293        | <i>LAMC1</i>   | GO:0007492 | Laminin subunit gamma-1                            |
| NM_020909        | <i>EPB41L5</i> | GO:0007492 | Band 4.1-like protein 5                            |
| NM_001904        | <i>CTNNB1</i>  | GO:0001711 | Catenin beta-1                                     |
| NM_022454        | <i>SOX17</i>   | GO:0001706 | Transcription factor SOX-17                        |
| NM_000127        | <i>EXT1</i>    | GO:0007492 | Exostosin-1                                        |
| NM_015193        | <i>ARC</i>     | GO:0007492 | Activity-regulated cytoskeleton-associated protein |
| NM_017617        | <i>NOTCH1</i>  | GO:0007492 | Neurogenic locus notch homolog protein 1           |
| NM_012242        | <i>DKK1</i>    | GO:0007492 | Dickkopf-related protein 1                         |
| NM_004329        | <i>BMPRIA</i>  | GO:0048382 | Bone morphogenetic protein receptor type-1A        |
| NM_002729        | <i>HHEX</i>    | GO:0007492 | Hematopoietically-expressed homeobox protein HHEX  |
| NM_003393        | <i>WNT8B</i>   | GO:0007492 | Protein Wnt-8b                                     |
| NM_004626        | <i>WNT11</i>   | GO:0007492 | Protein Wnt-11                                     |
| NM_014212        | <i>HOXC11</i>  | GO:0007492 | Homeobox protein Hox-C11                           |
| NM_003317        | <i>NKX2-1</i>  | GO:0007492 | Homeobox protein Nkx-2.1                           |
| NM_006194        | <i>PAX9</i>    | GO:0007492 | Paired box protein Pax-9                           |
| NM_004498        | <i>ONECUT1</i> | GO:0007492 | Hepatocyte nuclear factor 6                        |
| NM_005902        | <i>SMAD3</i>   | GO:0007492 | Mothers against decapentaplegic homolog 3          |
| NM_005568        | <i>LHX1</i>    | GO:0001706 | LIM/homeobox protein Lhx1                          |
| NM_000458        | <i>HNF1B</i>   | GO:0042663 | Hepatocyte nuclear factor 1-beta                   |
| NM_004459        | <i>BPTF</i>    | GO:0007492 | Nucleosome-remodeling factor subunit BPTF          |
| NM_182641        | <i>BPTF</i>    | GO:0007492 | Nucleosome-remodeling factor subunit BPTF          |
| NM_005257        | <i>GATA6</i>   | GO:0007492 | Transcription factor GATA-6                        |
| NM_005901        | <i>SMAD2</i>   | GO:0007492 | Mothers against decapentaplegic homolog 2          |
| NM_001003652     | <i>SMAD2</i>   | GO:0007492 | Mothers against decapentaplegic homolog 2          |
| NM_005359        | <i>SMAD4</i>   | GO:0007492 | Mothers against decapentaplegic homolog 4          |
| NM_000660        | <i>TGFB1</i>   | GO:0007492 | Transforming growth factor beta-1                  |
| NM_021784        | <i>FOXA2</i>   | GO:0007492 | Hepatocyte nuclear factor 3-beta                   |
| NM_153675        | <i>FOXA2</i>   | GO:0007492 | Hepatocyte nuclear factor 3-beta                   |

**Supplementary Table 5.** Mesoderm development-related genes

| Accession number | Gene           | GO number  | Function                                                                |
|------------------|----------------|------------|-------------------------------------------------------------------------|
| NM_004431        | <i>EPHA2</i>   | GO:0048320 | Ephrin type-A receptor 2                                                |
| NM_012090        | <i>MACF1</i>   | GO:0001707 | Microtubule-actin cross-linking factor 1, isoform 4                     |
| NM_033044        | <i>MACF1</i>   | GO:0001707 | Microtubule-actin cross-linking factor 1, isoform 4                     |
| NM_005424        | <i>TIE1</i>    | GO:0007498 | Tyrosine-protein kinase receptor Tie-1                                  |
| NM_018230        | <i>NUP133</i>  | GO:0048339 | Nuclear pore complex protein Nup133                                     |
| NM_016170        | <i>TLX2</i>    | GO:0001707 | T-cell leukemia homeobox protein 2                                      |
| NM_031283        | <i>TCF7L1</i>  | GO:0048319 | Transcription factor 7-like 1                                           |
| NM_020909        | <i>EPB41L5</i> | GO:0048339 | Band 4.1-like protein 5                                                 |
| NM_001616        | <i>ACVR2A</i>  | GO:0007498 | Activin receptor type-2A                                                |
| NM_001105        | <i>ACVR1</i>   | GO:0007498 | Activin receptor type-1                                                 |
| NM_001204        | <i>BMPR2</i>   | GO:0001707 | Bone morphogenetic protein receptor type-2                              |
| NM_001106        | <i>ACVR2B</i>  | GO:0007498 | Activin receptor type-2B                                                |
| NM_003212        | <i>TDGF3</i>   | GO:0007500 | Putative teratocarcinoma-derived growth factor 2                        |
| NM_003741        | <i>CHRD</i>    | GO:0001707 | Chordin                                                                 |
| NM_003722        | <i>TP63</i>    | GO:0007499 | Tumor protein 63                                                        |
| NM_002111        | <i>HTT</i>     | GO:0048341 | Huntingtin                                                              |
| NM_016269        | <i>LEF1</i>    | GO:0048341 | Lymphoid enhancer-binding factor 1                                      |
| NM_005900        | <i>SMAD1</i>   | GO:0001710 | Mothers against decapentaplegic homolog 1                               |
| NM_001003688     | <i>SMAD1</i>   | GO:0001710 | Mothers against decapentaplegic homolog 1                               |
| NM_002715        | <i>PPP2CA</i>  | GO:0007498 | Serine/threonine-protein phosphatase 2A catalytic subunit alpha isoform |
| NM_001453        | <i>FOXC1</i>   | GO:0048343 | Forkhead box protein C1                                                 |
| NM_033229        | <i>TRIM15</i>  | GO:0007500 | Tripartite motif-containing protein 15                                  |
| NM_003131        | <i>SRF</i>     | GO:0001707 | Serum response factor                                                   |
| NM_003376        | <i>VEGFA</i>   | GO:0007498 | Vascular endothelial growth factor A                                    |
| NM_198392        | <i>TCF21</i>   | GO:0007498 | Transcription factor 21                                                 |
| NM_003206        | <i>TCF21</i>   | GO:0007498 | Transcription factor 21                                                 |
| NM_003181        | <i>T</i>       | GO:0007498 | Brachyury protein                                                       |

|           |               |            |                                               |
|-----------|---------------|------------|-----------------------------------------------|
| NM_002192 | <i>INHBA</i>  | GO:0048333 | Inhibin beta A chain                          |
| NM_006060 | <i>IKZF1</i>  | GO:0007498 | DNA-binding protein Ikaros                    |
| NM_177524 | <i>MEST</i>   | GO:0007498 | Mesoderm-specific transcript homolog protein  |
| NM_177525 | <i>MEST</i>   | GO:0007498 | Mesoderm-specific transcript homolog protein  |
| NM_002402 | <i>MEST</i>   | GO:0007498 | Mesoderm-specific transcript homolog protein  |
| NM_000193 | <i>SHH</i>    | GO:0007502 | Sonic hedgehog protein                        |
| NM_023106 | <i>FGFR1</i>  | GO:0048378 | Basic fibroblast growth factor receptor 1     |
| NM_023105 | <i>FGFR1</i>  | GO:0048378 | Basic fibroblast growth factor receptor 1     |
| NM_023111 | <i>FGFR1</i>  | GO:0048378 | Basic fibroblast growth factor receptor 1     |
| NM_015850 | <i>FGFR1</i>  | GO:0048378 | Basic fibroblast growth factor receptor 1     |
| NM_023110 | <i>FGFR1</i>  | GO:0048378 | Basic fibroblast growth factor receptor 1     |
| NM_023107 | <i>FGFR1</i>  | GO:0048378 | Basic fibroblast growth factor receptor 1     |
| NM_023108 | <i>FGFR1</i>  | GO:0048378 | Basic fibroblast growth factor receptor 1     |
| NM_003068 | <i>SNAI2</i>  | GO:0007499 | Zinc finger protein SNAI2                     |
| NM_000127 | <i>EXT1</i>   | GO:0007498 | Exostosin-1                                   |
| NM_003923 | <i>FOXH1</i>  | GO:0048318 | Forkhead box protein H1                       |
| NM_004972 | <i>JAK2</i>   | GO:0007498 | Tyrosine-protein kinase JAK2                  |
| NM_173198 | <i>NR4A3</i>  | GO:0001707 | Nuclear receptor subfamily 4 group A member 3 |
| NM_173199 | <i>NR4A3</i>  | GO:0001707 | Nuclear receptor subfamily 4 group A member 3 |
| NM_006981 | <i>NR4A3</i>  | GO:0001707 | Nuclear receptor subfamily 4 group A member 3 |
| NM_173200 | <i>NR4A3</i>  | GO:0001707 | Nuclear receptor subfamily 4 group A member 3 |
| NM_004235 | <i>KLF4</i>   | GO:0007500 | Kruppel-like factor 4                         |
| NM_004329 | <i>BMPRIA</i> | GO:0048378 | Bone morphogenetic protein receptor type-1A   |
| NM_000401 | <i>EXT2</i>   | GO:0001707 | Exostosin-2                                   |
| NM_207122 | <i>EXT2</i>   | GO:0001707 | Exostosin-2                                   |
| NM_004561 | <i>OVOL1</i>  | GO:0007498 | Putative transcription factor Ovo-like 1      |
| NM_005430 | <i>WNT1</i>   | GO:0048332 | Proto-oncogene Wnt-1                          |
| NM_005811 | <i>GDF11</i>  | GO:0007498 | Growth/differentiation factor 11              |
| NM_182742 | <i>TXNRD1</i> | GO:0001707 | Thioredoxin reductase 1, cytoplasmic          |
| NM_182743 | <i>TXNRD1</i> | GO:0001707 | Thioredoxin reductase 1, cytoplasmic          |

|              |                |            |                                                               |
|--------------|----------------|------------|---------------------------------------------------------------|
| NM_003330    | <i>TXNRD1</i>  | GO:0001707 | Thioredoxin reductase 1, cytoplasmic                          |
| NM_182729    | <i>TXNRD1</i>  | GO:0001707 | Thioredoxin reductase 1, cytoplasmic                          |
| NM_016569    | <i>TBX3</i>    | GO:0048332 | T-box transcription factor TBX3                               |
| NM_005996    | <i>TBX3</i>    | GO:0048332 | T-box transcription factor TBX3                               |
| NM_000545    | <i>HNF1A</i>   | GO:0048341 | Hepatocyte nuclear factor 1-alpha                             |
| NM_006237    | <i>POU4F1</i>  | GO:0007498 | POU domain, class 4, transcription factor 1                   |
| NM_130850    | <i>BMP4</i>    | GO:0048392 | Bone morphogenetic protein 4                                  |
| NM_130851    | <i>BMP4</i>    | GO:0048392 | Bone morphogenetic protein 4                                  |
| NM_001202    | <i>BMP4</i>    | GO:0048392 | Bone morphogenetic protein 4                                  |
| NM_005902    | <i>SMAD3</i>   | GO:0001707 | Mothers against decapentaplegic homolog 3                     |
| NM_003502    | <i>AXIN1</i>   | GO:0048320 | Axin-1                                                        |
| NM_181050    | <i>AXIN1</i>   | GO:0048320 | Axin-1                                                        |
| NM_004608    | <i>TBX6</i>    | GO:0007498 | T-box transcription factor TBX6                               |
| NM_005251    | <i>FOXC2</i>   | GO:0048343 | Forkhead box protein C2                                       |
| NM_183231    | <i>IKZF3</i>   | GO:0007498 | Zinc finger protein Aiolos                                    |
| NM_183230    | <i>IKZF3</i>   | GO:0007498 | Zinc finger protein Aiolos                                    |
| NM_183232    | <i>IKZF3</i>   | GO:0007498 | Zinc finger protein Aiolos                                    |
| NM_012481    | <i>IKZF3</i>   | GO:0007498 | Zinc finger protein Aiolos                                    |
| NM_183229    | <i>IKZF3</i>   | GO:0007498 | Zinc finger protein Aiolos                                    |
| NM_183228    | <i>IKZF3</i>   | GO:0007498 | Zinc finger protein Aiolos                                    |
| NM_030753    | <i>WNT3</i>    | GO:0001707 | Proto-oncogene Wnt-3                                          |
| NM_212471    | <i>PRKARIA</i> | GO:0001707 | cAMP-dependent protein kinase type I-alpha regulatory subunit |
| NM_002734    | <i>PRKARIA</i> | GO:0001707 | cAMP-dependent protein kinase type I-alpha regulatory subunit |
| NM_212472    | <i>PRKARIA</i> | GO:0001707 | cAMP-dependent protein kinase type I-alpha regulatory subunit |
| NM_003004    | <i>SECTM1</i>  | GO:0007498 | Secreted and transmembrane protein 1                          |
| NM_020648    | <i>TWSG1</i>   | GO:0001707 | Twisted gastrulation protein homolog 1                        |
| NM_005901    | <i>SMAD2</i>   | GO:0001707 | Mothers against decapentaplegic homolog 2                     |
| NM_001003652 | <i>SMAD2</i>   | GO:0001707 | Mothers against decapentaplegic homolog 2                     |
| NM_005359    | <i>SMAD4</i>   | GO:0007498 | Mothers against decapentaplegic homolog 4                     |
| NM_000479    | <i>AMH</i>     | GO:0007506 | Muellerian-inhibiting factor                                  |
| NM_002378    | <i>MATK</i>    | GO:0007498 | Megakaryocyte-associated tyrosine-protein                     |

|           |               |            |                                                                                |
|-----------|---------------|------------|--------------------------------------------------------------------------------|
|           |               |            | kinase                                                                         |
| NM_139354 | <i>MATK</i>   | GO:0007498 | Megakaryocyte-associated tyrosine-protein kinase                               |
| NM_139355 | <i>MATK</i>   | GO:0007498 | Megakaryocyte-associated tyrosine-protein kinase                               |
| NM_016581 | <i>ECSIT</i>  | GO:0001707 | Evolutionarily conserved signaling intermediate in Toll pathway, mitochondrial |
| NM_002730 | <i>PRKACA</i> | GO:0001707 | cAMP-dependent protein kinase catalytic subunit alpha                          |
| NM_207518 | <i>PRKACA</i> | GO:0001707 | cAMP-dependent protein kinase catalytic subunit alpha                          |
| NM_203486 | <i>DLL3</i>   | GO:0048339 | Delta-like protein 3                                                           |
| NM_016941 | <i>DLL3</i>   | GO:0048339 | Delta-like protein 3                                                           |
| NM_004609 | <i>TCF15</i>  | GO:0007498 | Transcription factor 15                                                        |
| NM_002110 | <i>HCK</i>    | GO:0007498 | Tyrosine-protein kinase HCK                                                    |
| NM_172110 | <i>EYA2</i>   | GO:0007501 | Eyes absent homolog 2                                                          |
| NM_005244 | <i>EYA2</i>   | GO:0007501 | Eyes absent homolog 2                                                          |
| NM_005985 | <i>SNAI1</i>  | GO:0001707 | Zinc finger protein SNAI1                                                      |
| NM_001719 | <i>BMP7</i>   | GO:0001707 | Bone morphogenetic protein 7                                                   |
| NM_181832 | <i>NF2</i>    | GO:0001707 | Merlin                                                                         |
| NM_181831 | <i>NF2</i>    | GO:0001707 | Merlin                                                                         |
| NM_181833 | <i>NF2</i>    | GO:0001707 | Merlin                                                                         |
| NM_181828 | <i>NF2</i>    | GO:0001707 | Merlin                                                                         |
| NM_181825 | <i>NF2</i>    | GO:0001707 | Merlin                                                                         |
| NM_000268 | <i>NF2</i>    | GO:0001707 | Merlin                                                                         |
| NM_181829 | <i>NF2</i>    | GO:0001707 | Merlin                                                                         |
| NM_016418 | <i>NF2</i>    | GO:0001707 | Merlin                                                                         |
| NM_181830 | <i>NF2</i>    | GO:0001707 | Merlin                                                                         |
| NM_203281 | <i>BMX</i>    | GO:0007498 | Cytoplasmic tyrosine-protein kinase BMX                                        |
| NM_001721 | <i>BMX</i>    | GO:0007498 | Cytoplasmic tyrosine-protein kinase BMX                                        |
| NM_000061 | <i>BTK</i>    | GO:0007498 | Tyrosine-protein kinase BTK                                                    |
| NM_003308 | <i>TSPY1</i>  | GO:0007506 | Testis-specific Y-encoded protein 1                                            |



**Supplementary Table 6.** Ectoderm development-related genes

| Accession number | Gene           | GO number  | Function                                         |
|------------------|----------------|------------|--------------------------------------------------|
| NM_003443        | <i>ZBTB17</i>  | GO:0007398 | Zinc finger and BTB domain-containing protein 17 |
| NM_015872        | <i>ZBTB7B</i>  | GO:0007398 | Zinc finger and BTB domain-containing protein 7B |
| NM_012476        | <i>VAX2</i>    | GO:0007398 | Ventral anterior homeobox 2                      |
| NM_020909        | <i>EPB41L5</i> | GO:0007398 | Band 4.1-like protein 5                          |
| NM_003507        | <i>FZD7</i>    | GO:0042666 | Frizzled-7                                       |
| NM_001904        | <i>CTNNB1</i>  | GO:0007398 | Catenin beta-1                                   |
| NM_003220        | <i>TFAP2A</i>  | GO:0007398 | Transcription factor AP-2-alpha                  |
| NM_181349        | <i>SMURF1</i>  | GO:0007398 | E3 ubiquitin-protein ligase SMURF1               |
| NM_020429        | <i>SMURF1</i>  | GO:0007398 | E3 ubiquitin-protein ligase SMURF1               |
| NM_000193        | <i>SHH</i>     | GO:0007398 | Sonic hedgehog protein                           |
| NM_004329        | <i>BMPRIA</i>  | GO:0007398 | Bone morphogenetic protein receptor type-1A      |
| NM_001422        | <i>ELF5</i>    | GO:0007398 | ETS-related transcription factor Elf-5           |
| NM_198381        | <i>ELF5</i>    | GO:0007398 | ETS-related transcription factor Elf-5           |
| NM_005555        | <i>KRT6B</i>   | GO:0007398 | Keratin, type II cytoskeletal 6B                 |
| NM_005554        | <i>KRT6A</i>   | GO:0007398 | Keratin, type II cytoskeletal 6A                 |
| NM_001980        | <i>STX2</i>    | GO:0007398 | Syntaxin-2                                       |
| NM_194356        | <i>STX2</i>    | GO:0007398 | Syntaxin-2                                       |
| NM_005568        | <i>LHX1</i>    | GO:0001705 | LIM/homeobox protein Lhx 1                       |
| NM_021784        | <i>FOXA2</i>   | GO:0001705 | Hepatocyte nuclear factor 3-beta                 |
| NM_153675        | <i>FOXA2</i>   | GO:0001705 | Hepatocyte nuclear factor 3-beta                 |
| NM_181832        | <i>NF2</i>     | GO:0007398 | Merlin                                           |
| NM_181831        | <i>NF2</i>     | GO:0007398 | Merlin                                           |
| NM_181833        | <i>NF2</i>     | GO:0007398 | Merlin                                           |
| NM_181828        | <i>NF2</i>     | GO:0007398 | Merlin                                           |
| NM_181825        | <i>NF2</i>     | GO:0007398 | Merlin                                           |
| NM_000268        | <i>NF2</i>     | GO:0007398 | Merlin                                           |
| NM_181829        | <i>NF2</i>     | GO:0007398 | Merlin                                           |
| NM_016418        | <i>NF2</i>     | GO:0007398 | Merlin                                           |

|              |            |            |                 |
|--------------|------------|------------|-----------------|
| NM_181830    | <i>NF2</i> | GO:0007398 | Merlin          |
| NM_001399    | <i>EDA</i> | GO:0007398 | Ectodysplasin-A |
| NM_001005615 | <i>EDA</i> | GO:0007398 | Ectodysplasin-A |
| NM_001005612 | <i>EDA</i> | GO:0007398 | Ectodysplasin-A |
| NM_001005611 | <i>EDA</i> | GO:0007398 | Ectodysplasin-A |
| NM_001005609 | <i>EDA</i> | GO:0007398 | Ectodysplasin-A |
| NM_001005610 | <i>EDA</i> | GO:0007398 | Ectodysplasin-A |
